# Supplementary material for: Spectrum of Genetic Variants Associated with Maple Syrup Urine Disease in the Middle East and North Africa (MENA) Region: A Systematic Review
Source: Research Square preprint supplement (doi:10.21203/rs.3.rs-3944099/v1), 2024-03-05
Supplement: Supplementary file 1 [file 4ef762b5d10bc6c14e75b954.xlsx]

## Sheet: Sheet1
#	Gene	dbSNP ID	Nucleotide change	Protein change	Zygosity	Variant type	MSUD Phenotype	Severity	Total number of patients screened	Number of patients reported with the variant	Country of origin	Consanguinity	InterVar	ClinVar Germline classification	EVS	HGMD	ACMG	UniProtKB	ClinVar GnomAD Allele frequency	Gnomad Total Allele Frequency	InterVar MAF in GnomAD	GnomAD Genetic Ancestry Groups	Reported in Other populations	GnomAD	Reference	ClinVar Name	ClinVar Protein change	ClinVar Accession	GRCh37Chromosome	GRCh37Location	GRCh38Chromosome	GRCh38Location	ClinVar VariationID	ClinVar AlleleID(s)	ClinVar Canonical SPDI	ClinVar Variant type	ClinVar Molecular consequence	ClinVar Germline date last evaluated	ClinVar Germline review status
1	BCKDHA		c.488_1167+3del	p.Val163Glyfs*6	HO	Frameshift	Type IA	Intermediate	5	1	Lebanon	Yes	NR		NR	NR		NR	NR	NR	NR	NR			35
2	BCKDHA		c.409G>A†	p.Glu137Lys	HO	Missense	Type IA	NR	52	1	KSA	Yes	NR												9
3	BCKDHA		c.660_663delGTAC	p.Tyr221Glnfs*108*	HO	Frameshift	Type IA	Severe (classic)	52	1	KSA	Yes	NR												9
4	BCKDHA		c.809G>A†	p.Ala270Thr	HO	Missense	Type IA	Intermediate	52	2	KSA	Yes	NR												9
5	BCKDHA		c.896A>C†	p.Asp299Ala	HO	Missense	Type IA	Severe (classic)	52	1	KSA	Yes	NR												9
6	BCKDHA		c.1270C>T	p.Gln424Ter	HO	Nonsense	Type IA	Severe (classic)	52	1	KSA	Yes	NR												9
7	BCKDHA	rs1555765593	c.143delT	p.Leu48ArgfsX14	HO	Frameshift	Type IA	Severe (classic)	20, 40	1, 1	Iran, Iran	Yes, Yes	NR	Pathogenic			Pathogenic								36, 37	NM_000709.4(BCKDHA):c.143del (p.Leu48fs)	L48fs	VCV000522650	19	41916576	19	41410671	522650	513375	NC_000019.10:41410670:T:	Deletion	frameshift variant	Jan 1, 2021	criteria provided, multiple submitters, no conflicts
8	BCKDHA		c.(375+1376-1)(884+1885-1)	Splice	HO	Deletion	Type IA	Severe (classic)	20	1	Iran	Yes	NR												36
9	BCKDHA		c.375+648_484+520del	p.Gly126ValfsTer3	HO	Frameshift	Type IA	Severe (classic)	1	1	Kurdish Iraq	Yes	NR												3
10	BCKDHA		c.702delT	p.Tyr235ThrfsX94	HO	Frameshift	Type IA	Severe (classic)	40, 20	1, 1	Iran, Iran	Yes, Yes	NR												37, 36
11	BCKDHA		c.731G>A†	p.Gly244Glu	HO	Missense	Type IA	Severe (classic)	40, 20	1, 1	Iran, Iran	Yes, Yes	NR												37, 36
12	BCKDHA	rs1555767169	c.1167+1G>T	Splice	HO	Splice site	Type IA	Severe (classic)	40, 20	1, 1	Iran, Iran	Yes, Yes	NR	Likely pathogenic											37, 36	NM_000709.4(BCKDHA):c.1167+1del		VCV000556511	19	41929074	19	41423169	556511	549175	NC_000019.10:41423168:GG:G	Deletion	splice donor variant	Jan 1, 2018	criteria provided, single submitter
13	BCKDHA		c.(375+1_376–1)_(884+1_885–1)del	Splice	CH	Deletion	Type IA	Severe (classic)	40	1	Iran	Yes	NR												37
14	BCKDHA		c.355–356Ins7nt	p.D355Dfs	HO	Frameshift	Type IA	Severe (classic)	40	1	Iran	Yes	NR												37
15	BCKDHA		c.703delT	Splice	HO	Deletion	Type IA	Severe (classic)	40	1	Iran	Yes	NR												37
16	BCKDHA	rs2122143379	c.773G>A†	p.Cys258Tyr	HO	Missense	Type IA	Severe (classic)	12, 19	3, 1	Turkey, Turkey	-, Yes	NR	Pathogenic/Likely pathogenic			Pathogenic/Likely pathogenic								12, 38	NM_000709.4(BCKDHA):c.773_774delinsAA (p.Cys258Ter)	C258*	VCV001325805	19	41928195 - 41928196	19	41422290 - 41422291	1325805	1316066	NC_000019.10:41422289:GC:AA	Indel	nonsense	Jan 1, 2023	criteria provided, multiple submitters, no conflicts
17	BCKDHA		c.373C>G‡	p.Gln125Glu	HO	Missense	Type IA	Severe (classic)	12, 19	1, 1	Turkey, Turkey	-, Yes	NR												12, 38
18	BCKDHA		c.783G>A+784C>A	p.Cys258Ter	CH	Nonsense	Type IA	Severe (classic)	19	1	Turkey	No	NR												38
19	BCKDHA		c.919G>A†	p.Arg297His	CH	Missense	Type IA	Mild	19, 15	1, 1	Turkey, Turkey	No, Yes	NR												38, 39
20	BCKDHA		c.982G>A†	p.Ala328Thr	HO	Missense	Type IA	Mild	19, 15	1, 1	Turkey, Turkey	Yes, Yes	NR												38, 39
21	BCKDHB	rs398124560	c.1006G>A*	p.Gly336Ser	HO	Missense		Severe (classic)	52	3	KSA	Yes	NR										China(19)	0.000003985(east asian)HT	9
22	BCKDHA		c.908_909delTG	p.Phe304Cysfs*36	HO	Frameshift	Type IA	Severe (classic)	9	1	Jordan	Yes	NR												40
23	BCKDHA		c.512_512delT	p.Leu171Argfs*159	CH	Frameshift	Type IA	Severe (classic)	33	1	Egypt	-	NR												41
24	BCKDHA	rs972403437	c.947_956delGGGCTGTGGC	p.Arg316Glnfs*11	CH	Frameshift	Type IA	Severe (classic)	33	1	Egypt	-	NR	Uncertain significance											41	NM_000709.4(BCKDHA):c.947G>A (p.Arg316Gln)	R316Q, R315Q	VCV001035138	19	41928627	19	41422722	1035138	1034324	NC_000019.10:41422721:G:A	single nucleotide variant	missense variant	Jan 1, 2022	criteria provided, single submitter
25	BCKDHA		c.859_866delCGAGGCCC	p.Gly288Valfs*11	CH	Frameshift	Type IA	Severe (classic)	33	1	Egypt	-	NR												41
26	BCKDHA		c.205C>T	p.Gln69Ter	HO	Nonsense	Type IA	Severe (classic)	19	1	Turkey	No	NR												38
27	BCKDHB		c.716A>G†	p.Glu239Gly	HO	Missense	Type IB	Severe (classic)	3	2	Tunisia	Yes	NR												42
28	BCKDHB		c.(343+1_344–1)_(742+1_743–1)del	Splice	CH	Deletion	Type IB	Severe (classic)	40	1	Iran	Yes	NR												37
29	BCKDHB		c.92_102del	p.Arg31Glnfs*16	HO	Frameshift	Type IB	Intermediate	5	1	Lebanon	Yes	NR												35
30	BCKDHB		c.197G>C‡	p.Gly66Arg	HO	Missense	Type IB	Severe (classic)	52	3	KSA	Yes	NR												9
31	BCKDHB		c.286delGAA	p.Glu96del	HO	Deletion	Type IB	Severe (classic)	52	1	KSA	Yes	NR												9
32	BCKDHB		c.1004G>A‡	p.Gly335Asp	HO	Missense	Type IB	Severe (classic)	52	3	KSA	Yes	NR												9
33	BCKDHB		c.1145T>C†	p.Cys382Ser	HO	Missense	Type IB	Severe (classic)	52	1	KSA	Yes	NR												9
34	BCKDHB		c.833_834insCAC	p. Gly278_Thr279insThr	HO	Insertion	Type IB	Severe (classic)	40, 21	1, 1	Iran, Iran	Yes, Yes	NR												37 43
35	BCKDHB		c.834_836dupCAC	Splice	HO	Duplication	Type IB	Severe (classic)	40	1	Iran	Yes	NR												37
36	BCKDHB		c.484A>G†	p.Asn162Asp	HO	Missense	Type IB	Severe (classic)	40	1	Iran	Yes	NR												37
37	BCKDHB		c.357delT	p.Leu119>Leufs	HO	Frameshift	Type IA	Severe (classic)	40	1	Iran	Yes	NR												37
38	BCKDHB		c.272C>T†	p.Ala91Val	HO	Missense	Type IB	Severe (classic)	19	2	Turkey	Yes	NR												38
39	BCKDHB	rs190867671	c.1149T>A*	p.Tyr383Stop	HO	Nonsense		Severe (classic)	19, 19	3, 2	Turkey, Turkey	Yes, -	NR										China(36)	0.000007075(east Asian.european)HT	38, 44
40	BCKDHA	rs11549936	c.116C>A*	p.Pro39His	HO	Missense		Severe (classic)	19	1	Turkey	-	Benign	Benign/Likely benign			Benign	UniProtKB: P12694#VAR_034360	0.07892	0.1219	0.0776	Amish, European, (non-Finnish), Ashkenazi Jewish, Middle Eastern, South Asian, Admixed American, European (Finnish), African/African American, East Asian	Spain (14)	0.09656(in all population , HT,HO	44	NM_000709.4(BCKDHA):c.116C>A (p.Pro39His)	P39H	VCV000093341	19	41916549	19	41410644	93341	99248	NC_000019.10:41410643:C:A	single nucleotide variant	missense variant	Jan 1, 2022	criteria provided, multiple submitters, no conflicts
41	BCKDHB		c.688G>T	p.Glu230Ter	HO	Nonsense	Type IB	Severe (classic)	19	1	Turkey	Yes	NR				Pathogenic								38
42	BCKDHB		c.1015T>C†	p.Ser339Leu	HO	Missense	Type IB	Severe (classic)	19	1	Turkey	Yes	NR												38
43	BCKDHB		c.(274+-1_275-1)_(343+-1_344-1)del	Splice	CH	Deletion	Type IB	Severe (classic)	21, 40	1, 1	Iran, Iran	Yes, Yes	NR												43, 37
44	BCKDHB		c.1091A>G†	p.Asp364Gly	HO	Missense	Type IB	Moderate	33	4	Egypt	-	NR												41
45	BCKDHB		c.806G>A†	p.Gly269Glu	HO	Missense	Type IB	Moderate	33	1	Egypt	-	NR												41
46	BCKDHB		c.287_287delA	p.Asp97Metfas*133	HO	Frameshift	Type IB	Moderate	33	2	Egypt	-	NR												41
47	BCKDHB	rs1774478421	c.908_909insA	p.Asp303Glufs*15	HO	Frameshift	Type IB	Severe (classic)	33	2	Egypt	-	NR	Pathogenic											41	NM_183050.4(BCKDHB):c.908dup (p.Asp303fs)	D233fs, D303fs	VCV000849015	6	80912885 - 80912886	6	80203168 - 80203169	849015	832588	NC_000006.12:80203168:A:AA	Duplication	frameshift variant|non-coding transcript variant	Jan 1, 2019	criteria provided, single submitter
48	DBT		c.224G>A†	p.Gly75Glu	HO	Missense	Type II	Severe (classic)	5	2	Lebanon	Yes	NR												35
49	DBT	rs2100779888	c.1195T>C†	p.Ser399Pro	HO	Missense	Type II	Severe (classic)	52	1	KSA	Yes	NR	Pathogenic											9	NM_001918.5(DBT):c.1195del (p.Ser399fs)	S399fs	VCV001458115	1	100672015	1	100206459	1458115	1471679	NC_000001.11:100206458:AAA:AA	Deletion	frameshift variant	Jan 1, 2022	criteria provided, single submitter
50	DBT		c.1281+3A>G	Splice	CH	Splice site	Type II	NR	52	2	KSA	Yes	NR												9
51	DBT		c.562G>T	p.Gly188Trp	HO	Missense	Type II	Severe (classic)	40	1	Iran	Yes	NR												37
52	DBT		c.(363delCT)+(1238T>C)†	p.(Leu121Leufs) + (Ile413Thr)	CH	Frameshift	Type II	Severe (classic)	40	1	Iran	Yes	NR												37
53	DBT		c.(433+1_434–1)_(939+1_940–1)del	Splice	CH	Deletion	Type II	Severe (classic)	40	1	Iran	Yes	NR												37
54	DBT		c.1174A>C ‡	p.Thr392Pro	HO	Missense	Type II	Severe (classic)	10, 40	1, 1	Iran, Iran	Yes, Yes	NR												45, 37
55	DBT		c.85_86insAACG	Splice	HO	Insertion	Type II	Severe (classic)	40	1	Iran	Yes	NR												37
56	DBT		IVS3-1G>A	Splice	HO	Splice site	Type II	Severe (classic)	12, 19	1, 1	Turkey, Turkey	-, Yes	NR												12, 38
57	DBT	rs1553230703	c.788T>G†	p.Met263Arg	HO	Missense	Type II	Severe (classic)	19	2	Turkey	Yes	NR	Conflicting classifications of pathogenicity											38	NM_001918.5(DBT):c.788T>C (p.Met263Thr)	M263T	VCV000552494	1	100680524	1	100214968	552494	540634	NC_000001.11:100214967:A:G	single nucleotide variant	missense variant	Jan 1, 2022	criteria provided, conflicting classifications
58	DBT		c.940-1G>A	p.Ala314-Lys339del	HO	Deletion		Severe (classic)	32, 19, 19	1, 1, 1	Turkey, Turkey, Turkey	Yes, Yes, -	NR												46, 38, 44
59	DBT	rs2100761028	c.1333_1336delAATG	p.Asn445Ter	HO	Nonsense	Type II	Severe (classic)	3	1	Tunisia	Yes	NR	Pathogenic											42	NM_001918.5(DBT):c.1333_1336del (p.Met444_Asn445insTer)		VCV001376132	1	100661924 - 100661927	1	100196368 - 100196371	1376132	1466665	NC_000001.11:100196367:CATTCATT:CATT	Microsatellite	nonsense	Jan 1, 2021	criteria provided, single submitter
60	DBT	rs753685282	c.787A>T†	p.Met263Leu	HO	Missense	Type II	Severe (classic)	9	2	Jordan	Yes	NR	Uncertain significance											40	NM_001918.5(DBT):c.787A>G (p.Met263Val)	M263V	VCV001358173	1	100680525	1	100214969	1358173	1460472	NC_000001.11:100214968:T:C	single nucleotide variant	missense variant	Jan 1, 2022	criteria provided, single submitter
61	DBT	rs1449113689	c.1202T>C	p.Ile401Thr	HO	Missense		Severe (classic)	19	1	Turkey	Yes	NR	Conflicting classifications of pathogenicity			Likely pathogenic							0.00001061(European)HT	38	NM_001918.5(DBT):c.1202T>C (p.Ile401Thr)	I401T	VCV000552910	1	100672008	1	100206452	552910	540623	NC_000001.11:100206451:A:G	single nucleotide variant	missense variant	Jan 1, 2023	criteria provided, conflicting classifications
62	DBT	rs398123673	c.61delC	p.Arg21Alafs*12*	HO	Frameshift	Type II	NR	52	2	KSA	Yes	NR	Uncertain significance			Uncertain significance								9	NM_001918.5(DBT):c.61C>T (p.Arg21Cys)	R21C	VCV000094008	1	100706431	1	100240875	94008	99910	NC_000001.11:100240874:G:A	single nucleotide variant	missense variant	Jan 1, 2022	criteria provided, multiple submitters, no conflicts
63	DBT		c.939-2A>G	Splice	HO	Splice site	Type II	Severe (classic)	52	1	KSA	Yes	NR												9
64	DBT		IVS8-1G>A+c.1202T>C	Splice	CH	Splice site	Type II	Severe (classic)	19	1	Turkey	No	NR												38
65	DBT	rs398123660	c.1291C>T*	p.Arg431Stop	HO	Nonsense	Type IB	NR	33, 40	5, 1	Egypt, Iran	- , Yes	NR	Pathogenic/Likely pathogenic			Pathogenic						China(40)	0.000008428 (European, South Asian)HT	41, 37	NM_001918.5(DBT):c.1291C>T (p.Arg431Ter)	R431*	VCV000093991	1	100661969	1	100196413	93991	99893	NC_000001.11:100196412:G:A	single nucleotide variant	nonsense	Jan 1, 2023	criteria provided, multiple submitters, no conflicts
66	BCKDHA	rs137852870	c.1312T>A*	p.Tyr438Asn	HO	Missense	Type IB	NR	33	4	Egypt	-	NR										India, US (12, 13)	0.00007495(European)HT	41
67	PPM1K	rs1005542482	c.1A>G*	N/A	HO	Start-loss		NR	1	1	Turkey	Yes	NR												47
68	DBT	rs2100834784	c.241_242delGT*	p.Val81Ter	CH	Nonsense	Type II	Severe (classic)	33	1	Egypt	-	NR	Pathogenic											41	NM_001918.5(DBT):c.241_242del (p.Thr80_Val81insTer)		VCV001394661	1	100701001 - 100701002	1	100235445 - 100235446	1394661	1415550	NC_000001.11:100235444:ACA:A	Deletion	nonsense	Jan 1, 2021	criteria provided, single submitter
69	BCKDHB	rs1005542482	c.1A>T	p.Met1?*	HO	Nonsense		Severe (classic)	52	3	KSA	Yes	NR	Pathogenic/Likely pathogenic		CM159344							Spain(14)	0.00001288(european)HT	9	NM_183050.4(BCKDHB):c.1A>T (p.Met1Leu)	M1L	VCV000551456	6	80816411	6	80106694	551456	544243	NC_000006.12:80106693:A:T	single nucleotide variant	missense variant|initiator_codon_variant|non-coding transcript variant|intron variant	Jan 1, 2022	criteria provided, multiple submitters, no conflicts
70	BCKDHA	rs398123496	c.288+1G>A*	Splice	HO	Splice site		Severe (classic)	40, 20	2, 1	Iran, Iran	Yes, Yes	NR	Pathogenic			Pathogenic							0.00001592(latino and others)HT	37, 36	NM_000709.4(BCKDHA):c.288+1G>A		VCV000093351	19	41916722	19	41410817	93351	99258	NC_000019.10:41410816:G:A	single nucleotide variant	splice donor variant	Jan 1, 2023	criteria provided, multiple submitters, no conflicts
71	BCKDHB	rs371117671	c.331C>T*	p.Arg111Ter	HO	Nonsense	Type IB	Severe (classic)	19	1	Turkey	Yes	NR	Pathogenic		CM076020									38	NM_183050.4(BCKDHB):c.331C>T (p.Arg111Ter)	R111*, R41*	VCV000928847	6	80838934	6	80129217	928847	916978	NC_000006.12:80129216:C:T	single nucleotide variant	nonsense|non-coding transcript variant	Jan 1, 2023	criteria provided, multiple submitters, no conflicts
72	BCKDHA	rs398123498	c.347A>G	p.Asp116Gly	HO	Missense		Severe (classic)	52	1	KSA	Yes	NR	Conflicting classifications of pathogenicity			Likely pathogenic								9	NM_000709.4(BCKDHA):c.347A>G (p.Asp116Gly)	D116G	VCV000093354	19	41916886	19	41410981	93354	99261	NC_000019.10:41410980:A:G	single nucleotide variant	missense variant	Jan 1, 2021	criteria provided, conflicting classifications
73	BCKDHB	rs776631396	c.410C>T*	p.Ala137Val	HO	Missense	Type IB	NR	34, 40	1, 1	Egypt, Iran	-, Yes	NR	Conflicting classifications of pathogenicity		CM034726							China(36)	0.00001770 (European, latino admixed American )HT	41, 37	NM_183050.4(BCKDHB):c.410C>A (p.Ala137Glu)	A137E, A67E	VCV001027626	6	80877461	6	80167744	1027626	1015362	NC_000006.12:80167743:C:A	single nucleotide variant	missense variant|non-coding transcript variant	Jan 1, 2023	criteria provided, conflicting classifications
74	BCKDHA	rs34442879	c.452C>T*	p.Thr151Met	HO	Missense		Severe (classic)	40, 19	1, 1	Iran, Turkey	Yes, -	NR	Benign/Likely benign			Benign/Likely Benign	UniProtKB: P12694#VAR_034361					German(6)	0.009678( reported in all population in HO and HT)	37, 44	NM_000709.4(BCKDHA):c.452C>T (p.Thr151Met)	T151M	VCV000093361	19	41920030	19	41414125	93361	99268	NC_000019.10:41414124:C:T	single nucleotide variant	missense variant	Jan 1, 2023	criteria provided, multiple submitters, no conflicts
75	DBT	rs768832921	c.74delAT	p.C26Wfs*12*	HO	Frameshift		NR	52	1	KSA	Yes	NR	Pathogenic/Likely pathogenic			Pathogenic/Likely pathogenic						Spain(14)	0.00006373(Ashkenazi Jewish, East Asian,European,Latino)HT	9	NM_001918.5(DBT):c.75_76del (p.Cys26fs)	C26fs	VCV000011950	1	100706416 - 100706417	1	100240860 - 100240861	11950	26989	NC_000001.11:100240859:AT:	Deletion	frameshift variant	Jan 1, 2023	criteria provided, multiple submitters, no conflicts
76	DBT	rs794727263	c.137A>G	p.Lys46Arg	HO	Missense		Severe (classic)	52	3	KSA	Yes	NR	Uncertain significance											9	NM_001918.5(DBT):c.137A>G (p.Lys46Arg)	K46R	VCV000195158	1	100706355	1	100240799	195158	192319	NC_000001.11:100240798:T:C	single nucleotide variant	missense variant	Jan 1, 2015	criteria provided, single submitter
77	BCKDHB	rs1002472211	c.477+1G>A*	Splice	HO	Splice site		Severe (classic)	40	1	Iran	Yes	NR	Pathogenic			Pathogenic								37	NM_183050.4(BCKDHB):c.477+1G>A		VCV001457763	6	80877529	6	80167812	1457763	1471330	NC_000006.12:80167811:G:A	single nucleotide variant	splice donor variant	Jan 1, 2023	criteria provided, multiple submitters, no conflicts
78	BCKDHB	rs398124579	c.502C>T*	p.Arg168Cys	HO	Missense		Severe (classic)	52	2	KSA	Yes	NR	Conflicting classifications of pathogenicity		CM076024	Pathogenic								9	NM_183050.4(BCKDHB):c.502C>T (p.Arg168Cys)	R168C, R98C	VCV000096586	6	80878616	6	80168899	96586	102479	NC_000006.12:80168898:C:T	single nucleotide variant	missense variant|non-coding transcript variant	Jan 1, 2023	criteria provided, conflicting classifications
79	BCKDHB	rs149766077	c.547C>T*†	p.Arg183Trp	HO	Missense	Type IB	Severe (classic)	19	1	Turkey	Yes	NR	Likely pathogenic		CM093777	Likely pathogenic								38	NM_183050.4(BCKDHB):c.547C>T (p.Arg183Trp)	R183W, R113W	VCV000096595	6	80878661	6	80168944	96595	102488	NC_000006.12:80168943:C:T	single nucleotide variant	missense variant|non-coding transcript variant	Jan 1, 2023	criteria provided, multiple submitters, no conflicts
80	BCKDHB	rs774306610	c.564T>A*	p.Cys188Stop	HO	Nonsense		Severe (classic)	19	1	Turkey	Yes	NR	Pathogenic		CM093778	Pathogenic						Submitted to Clinvar by multiple submitters under the accession numbers (SCV002097381.1, SCV000833109.4, SCV002079871.1)Ethnicity not reported	0.00001193 (latino)HT	38	NM_183050.4(BCKDHB):c.564T>A (p.Cys188Ter)	C188*, C118*	VCV000580585	6	80878678	6	80168961	580585	563824	NC_000006.12:80168960:T:A	single nucleotide variant	nonsense|non-coding transcript variant	Jan 1, 2022	criteria provided, multiple submitters, no conflicts
81	DBT	rs572340170	c.30G>A	p.Try10Stop	HO	Nonsense	Type IB	NR	34	1	Egypt	-	NR	Pathogenic/Likely pathogenic			Likely pathogenic						Submitted to Clinvar by one submitter under accession number	0.000003980 (European) HT	41	NM_001918.5(DBT):c.29G>A (p.Trp10Ter)	W10*	VCV001395522	1	100715348	1	100249792	1395522	1424921	NC_000001.11:100249791:C:T	single nucleotide variant	nonsense	Jan 1, 2023	criteria provided, multiple submitters, no conflicts
82	BCKDHB	rs398124584	c.574G>A	p.Gly192Arg	HO	Missense		Severe (classic)	52	1	KSA	Yes	NR	Uncertain significance		CM1916260									9	NM_183050.4(BCKDHB):c.574G>A (p.Gly192Arg)	G192R, G122R	VCV000096596	6	80878688	6	80168971	96596	102489	NC_000006.12:80168970:G:A	single nucleotide variant	missense variant|non-coding transcript variant	Jan 1, 2013	criteria provided, single submitter
83	BCKDHB	rs1554189861	c.599C>T*	p.Pro200Leu	HO	Missense		Severe (classic)	40	1	Iran	Yes	NR	Uncertain significance		CM1314417									37	NM_183050.4(BCKDHB):c.599C>T (p.Pro200Leu)	P200L, P130L	VCV000553513	6	80878713	6	80168996	553513	543978	NC_000006.12:80168995:C:T	single nucleotide variant	missense variant|non-coding transcript variant	Jan 1, 2017	criteria provided, single submitter
84	BCKDHB	rs398124589	c.633+1G>A	Splice	HO	Splice site		Severe (classic)	40, 21	2, 1	Iran, Iran	Yes, Yes	NR	Pathogenic/Likely pathogenic										0.00001195(latino,european) HT	37, 43	NM_183050.4(BCKDHB):c.633+1G>T		VCV000553536	6	80878748	6	80169031	553536	544349	NC_000006.12:80169030:G:T	single nucleotide variant	splice donor variant	Jan 1, 2021	criteria provided, multiple submitters, no conflicts
85	BCKDHA		IVS6-1G>C	Splice	HO	Splice site		Severe (classic)	19	1	Turkey	Yes	NR												38
86	BCKDHA	rs753216964	c.647-1G>C*	Splice	CH	Splice site		NR	52, 9	1, 3	KSA, Jordan	Yes, No	NR	Pathogenic			Pathogenic						Submitted to Clinvar by multiple submitter, accession number (SCV000794842, SCV000949048)	0.000004025 (european)HT	9, 40	NM_000709.4(BCKDHA):c.647-1G>C		VCV000431985	19	41928068	19	41422163	431985	426316	NC_000019.10:41422162:G:C	single nucleotide variant	splice acceptor variant	Jan 1, 2023	criteria provided, multiple submitters, no conflicts
87	DBT	rs74103423	c.670G>T*	p.Glu224Stop	HO	Nonsense	Type IB	NR	33	4	Egypt	-	NR	Pathogenic			Pathogenic						Submitted to Clinvar by multiple submitters under accession numbers	0.00009193(African/African American) HT	41	NM_001918.5(DBT):c.670G>T (p.Glu224Ter)	E224*	VCV000094009	1	100681641	1	100216085	94009	99911	NC_000001.11:100216084:C:A	single nucleotide variant	nonsense	Jan 1, 2023	criteria provided, multiple submitters, no conflicts
88	BCKDHB	rs398124593	c.752T>C*	p.Val251Ala	HO	Missense		Severe (classic)	19, 19	1, 1	Turkey, Turkey	Yes, -	NR	Pathogenic/Likely pathogenic		CM015219	Pathogenic								38, 44	NM_183050.4(BCKDHB):c.752T>C (p.Val251Ala)	V251A, V181A	VCV000096608	6	80910660	6	80200943	96608	102501	NC_000006.12:80200942:T:C	single nucleotide variant	missense variant|non-coding transcript variant	Jan 1, 2023	criteria provided, multiple submitters, no conflicts
89	BCKDHA	rs199599175	c.757G>A*	p.Ala253Thr	HO	Missense		Severe (classic)	19	1	Turkey	Yes	NR	Pathogenic/Likely pathogenic			Pathogenic							0.000007072(european ,east Asian)HT	38	NM_000709.4(BCKDHA):c.757G>A (p.Ala253Thr)	A253T	VCV000558191	19	41928179	19	41422274	558191	548799	NC_000019.10:41422273:G:A	single nucleotide variant	missense variant	Jan 1, 2023	criteria provided, multiple submitters, no conflicts
90	BCKDHB	rs199738863	c.665A>G	p.Lys222Arg	HO	Missense		Severe (classic)	19, 19	1, 1	Turkey, Turkey	Yes, -	NR										-	0.0001595(european)HT	38, 44
91	BCKDHB	rs398124595	c.817A>C*	p.Thr273Pro	HO	Missense		Intermediate	52	8	KSA	Yes	NR	Uncertain significance											9	NM_183050.4(BCKDHB):c.817A>C (p.Thr273Pro)	T273P, T203P	VCV000096610	6	80910725	6	80201008	96610	102503	NC_000006.12:80201007:A:C	single nucleotide variant	missense variant|non-coding transcript variant	Jan 1, 2013	criteria provided, single submitter
92	BCKDHB	rs398124599	c.853C>T*	p.Arg285Stop	HO	Nonsense		NR	52, 34, 19, 40, 19	2, 1, 2, 1, 1	KSA, Egypt, Turkey, Iran, Turkey	Yes, - , Yes, Yes, -	NR	Conflicting classifications of pathogenicity			Pathogenic/Likely pathogenic/Uncertain significance							0.00004387(latino,east asian) HT	9, 41,38, 37, 44	NM_183050.4(BCKDHB):c.885del (p.Gly296fs)	G226fs, G296fs	VCV000096616	6	80912862	6	80203145	96616	102509	NC_000006.12:80203144:TT:T	Deletion	frameshift variant|non-coding transcript variant	Jan 1, 2023	criteria provided, conflicting classifications
93	BCKDHA	rs764247545	c.859C>T*	p.Arg287Stop	HO	Nonsense	Type IB	NR	34, 19, 19	1, 1, 1	Egypt, Turkey, Turkey	-, -, Yes	NR	Conflicting classifications of pathogenicity									Submitted to Clinvar by multiple submitter, accession number (SCV000794297.1, SCV001437327.1, SCV002033462.1, SCV001578971.2, SCV002088159.1) Ethnicity not reported	0.000007073(European.african/American,african)HT	41, 44, 38	NM_000709.4(BCKDHA):c.859C>G (p.Arg287Gly)	R286G, R287G	VCV001334170	19	41928539	19	41422634	1334170	1325030	NC_000019.10:41422633:C:G	single nucleotide variant	missense variant	Jan 1, 2023	criteria provided, conflicting classifications
94	BCKDHA	rs137852871	c.868G>A*	p.Gly290Arg	HO	Missense		Severe (classic)	19, 19	1, 1	Turkey, Turkey	-, Yes	NR	Pathogenic/Likely pathogenic			Pathogenic/Likely pathogenic	UniProtKB: P12694#VAR_015101					Mexico (10)	0.0000119(latino, European ) HT	44, 38	NM_000709.4(BCKDHA):c.868G>A (p.Gly290Arg)	G289R, G290R	VCV000002377	19	41928548	19	41422643	2377	17416	NC_000019.10:41422642:G:A	single nucleotide variant	missense variant	Jan 1, 2023	criteria provided, multiple submitters, no conflicts
95	BCKDHB	rs398124581	c.508G>T	p.Arg170Cys	HO	Missense		Severe (classic)	40, 21	3, 5	Iran, Iran	Yes, Yes	NR	Pathogenic/Likely pathogenic		CM154227								0.000007954(european) HT	37, 43	NM_183050.4(BCKDHB):c.508C>T (p.Arg170Cys)	R170C, R100C	VCV000096590	6	80878622	6	80168905	96590	102483	NC_000006.12:80168904:C:T	single nucleotide variant	missense variant|non-coding transcript variant	Jan 1, 2023	criteria provided, multiple submitters, no conflicts
96	BCKDHA	rs200137189	c.890G>A*	p.Arg297His	HO	Missense		Severe (classic)	40, 9	1, 2	Iran, Jordan	Yes, Yes	NR	Conflicting classifications of pathogenicity			Pathogenic/Likely pathogenic/Uncertain significance							0.00007071( Ashkenazi jews, African American European)HT	37, 40	NM_000709.4(BCKDHA):c.890G>A (p.Arg297His)	R297H, R296H	VCV000093376	19	41928570	19	41422665	93376	99283	NC_000019.10:41422664:G:A	single nucleotide variant	missense variant	Jan 1, 2023	criteria provided, conflicting classifications
97	BCKDHA	rs398123509	c.905A>C*	p.Asp302A1a	HO	Missense		Severe (classic)	52	4	KSA	Yes	NR	Pathogenic			Pathogenic								9	NM_000709.4(BCKDHA):c.905A>C (p.Asp302Ala)	D302A, D301A	VCV000093377	19	41928585	19	41422680	93377	99284	NC_000019.10:41422679:A:C	single nucleotide variant	missense variant	Jan 1, 2021	criteria provided, multiple submitters, no conflicts
98	BCKDHB	rs1057516572	c.730T>C	p.Tyr244His	HO	Missense		Severe (classic)	40	1	Iran	Yes	NR	Pathogenic/Likely pathogenic											37	NM_183050.4(BCKDHB):c.730del (p.Tyr244fs)	Y174fs, Y244fs	VCV000370540	6	80881093	6	80171376	370540	357522	NC_000006.12:80171375:TTT:TT	Deletion	frameshift variant|non-coding transcript variant	Jan 1, 2021	criteria provided, multiple submitters, no conflicts
99	BCKDHA	rs753698250	c.940C>T*	p.Arg314Ter	HO	Missense		Severe (classic)	52	1	KSA	Yes	NR	Pathogenic											9	NM_000709.4(BCKDHA):c.940C>T (p.Arg314Ter)	R314*, R313*	VCV000224072	19	41928620	19	41422715	224072	225801	NC_000019.10:41422714:C:T	single nucleotide variant	nonsense	Jan 1, 2023	criteria provided, multiple submitters, no conflicts
100	BCKDHB	rs398124603	c.970C>T*	p.Arg324Stop	HO	Nonsense	Type IB	NR	34	2	Egypt	-	NR	Pathogenic/Likely pathogenic		CM970165	Pathogenic/Likely pathogenic						US(34),Spain(35)	0.00005979 (Latino, European, African/American, African, southasian) HT	41	NM_183050.4(BCKDHB):c.970C>T (p.Arg324Ter)	R324*, R254*	VCV000096621	6	80982870	6	80273153	96621	102514	NC_000006.12:80273152:C:T	single nucleotide variant	nonsense|non-coding transcript variant	Jan 1, 2022	criteria provided, multiple submitters, no conflicts
101	BCKDHB	rs1224101411	c.988G>A	p.Glu330Lys	HO	Missense		Severe (classic)	40, 21	5, 4	Iran, Iran	Yes,, Yes	NR	Pathogenic/Likely pathogenic		CM1611415	Pathogenic/Likely pathogenic						Submitted to Clinvar by multiple submitters under the accession number	0.000003985(south asian)HT	37, 43	NM_183050.4(BCKDHB):c.988G>A (p.Glu330Lys)	E330K, E260K	VCV000557381	6	80982888	6	80273171	557381	544274	NC_000006.12:80273170:G:A	single nucleotide variant	missense variant|non-coding transcript variant	Jan 1, 2023	criteria provided, multiple submitters, no conflicts
102	BCKDHB	rs1554205541	c.995C>T*	p.Pro332Leu	HO	Missense	Type IB	NR	34	4	Egypt	-	NR	Conflicting classifications of pathogenicity		CM1822241	Likely pathogenic/uncertain significance								41	NM_183050.4(BCKDHB):c.995C>T (p.Pro332Leu)	P332L, P262L	VCV000432059	6	80982895	6	80273178	432059	425715	NC_000006.12:80273177:C:T	single nucleotide variant	missense variant|non-coding transcript variant	Jan 1, 2023	criteria provided, conflicting classifications
103	BCKDHA		c.1251delC	p.Aal418Profs*67	HO	Frameshift		NR	9	1	Jordan	Yes	NR	Likely pathogenic											40	NM_000709.4(BCKDHA):c.1251del (p.Ala418fs)	A417fs, A418fs	VCV002627668	19	41930424	19	41424519	2627668	2795180	NC_000019.10:41424518:CCC:CC	Deletion	frameshift variant		criteria provided, single submitter
104	DBT	rs578139656, rs12021720	c.1057A>T, c.1150A>G	p.Gly353Ser, p.Gly384Ser	CH	Missense		NR	9	1	Jordan	Yes	NR	Benign/Likely benign									Submitted to Clinvar by multiple submitters under accession numbers	0.000003977(European)HT, 0.9136 in all ethnicities	40	NM_001918.5(DBT):c.1150A>G (p.Ser384Gly)		VCV000128885	1	100672060	1	100206504	128885	134332	NC_000001.11:100206503:T:C	single nucleotide variant	missense variant	Jan 1, 2022	criteria provided, multiple submitters, no conflicts
105	BCKDHA		IVS8-2A>G*	Splice	HO	Splice site	Type IA	Severe (classic)	19	1	Turkey	Yes	NR												38
Zygosity (HO): Homozygous mutations where both alleles are identical. Zygosity (CH): Compound Heterozygous mutations involving different alleles. Consanguinity (Yes): Presence of consanguineous relationships. Consanguinity (No): Absence of consanguineous relationships. PolyPhen (Probably damaging†): Predicted to be damaging to protein function. PolyPhen (Possibly damaging ‡): Predicted to possibl…
